# Supplementary material
Source: publisher figshare collection journal article supplement (https://gsapubs.figshare.com/articles/dataset/_/22223389)
Supplement: Supplementary file 5 [file 1]

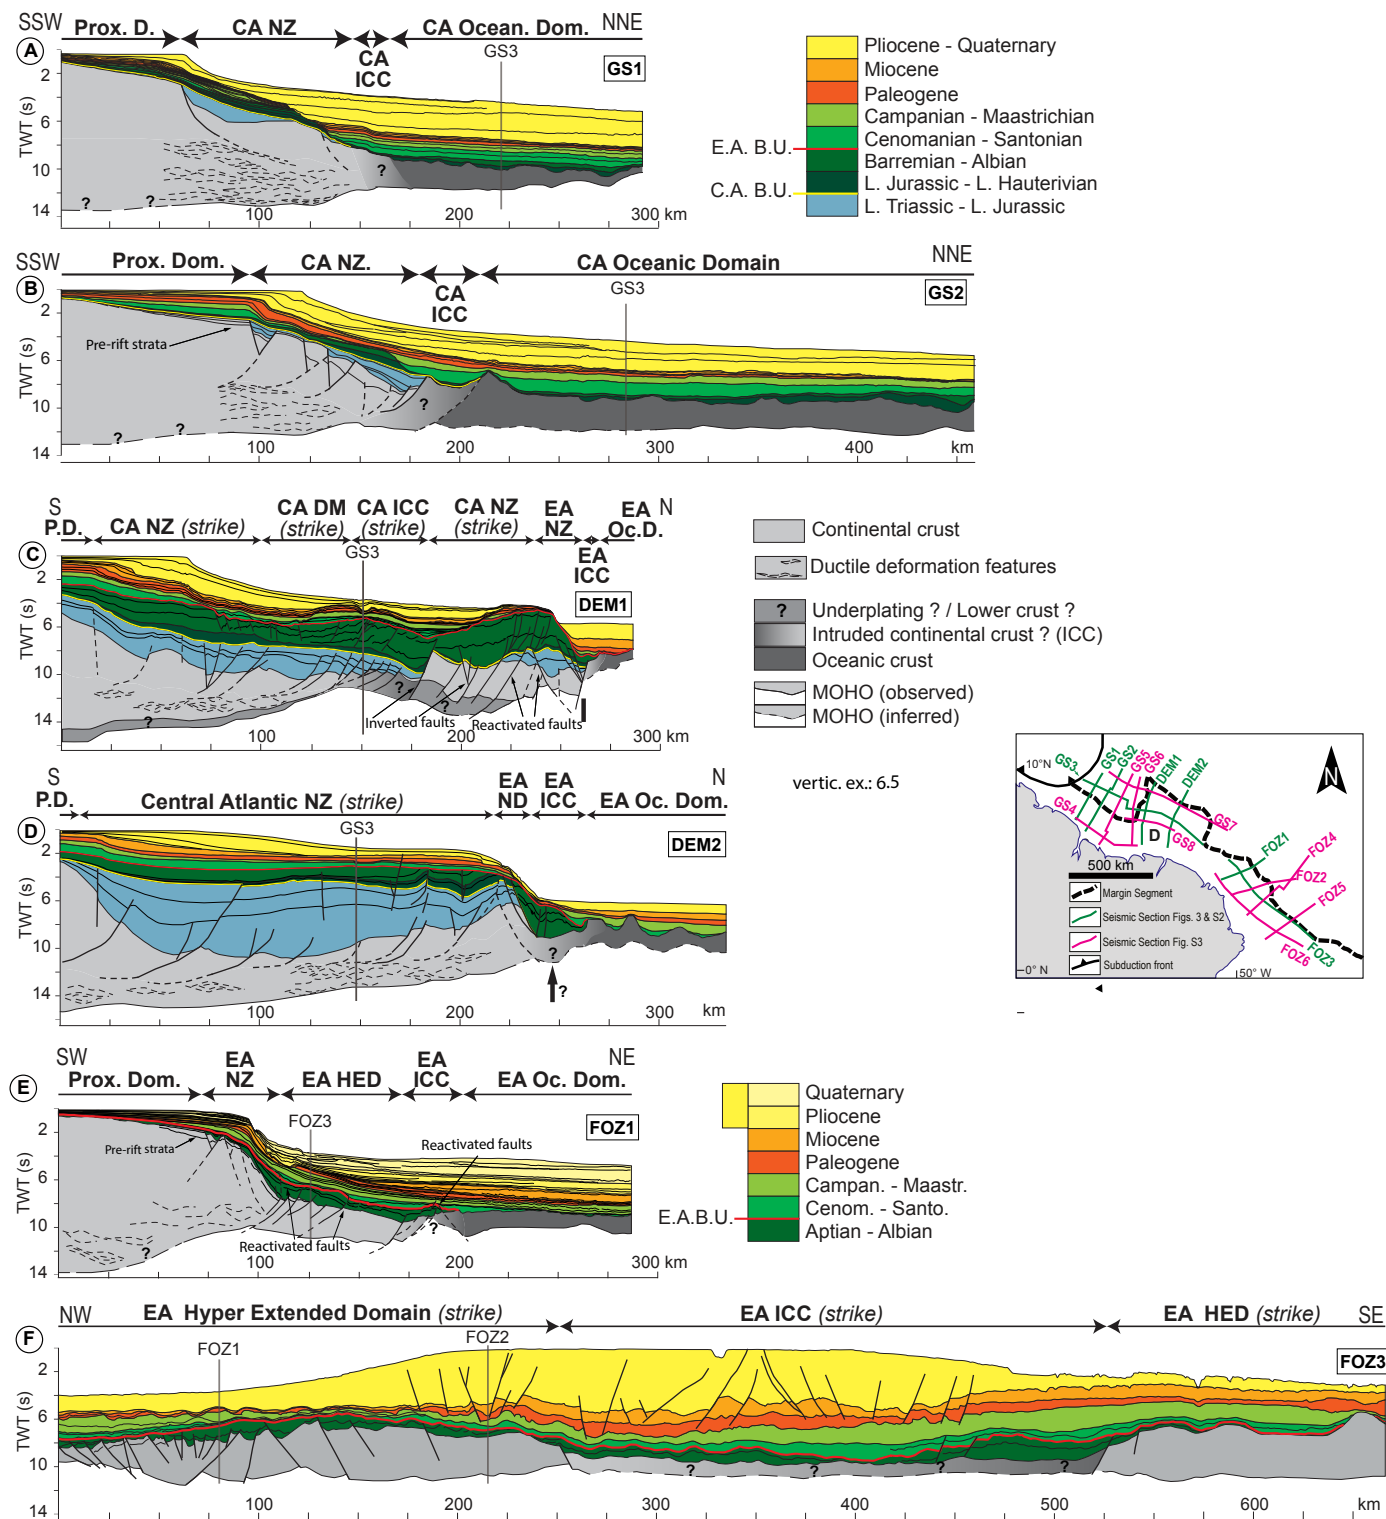

Rouby, D., Loparev, A., Chardon, D., Bajolet, F., Dall'Asta, M., Paquet, F., Fillon, C., Roig, J.-Y., and Ye, J., 2023, Sediment routing systems to the Atlantic rifted margin of the Guiana Shield: Geosphere, v. 19, <https://doi.org/10.1130/GES02561.1>.

Rouby et al., Fig. S3
