# Supplementary material
Source: publisher figshare collection journal article supplement (https://gsapubs.figshare.com/articles/dataset/_/22223389)

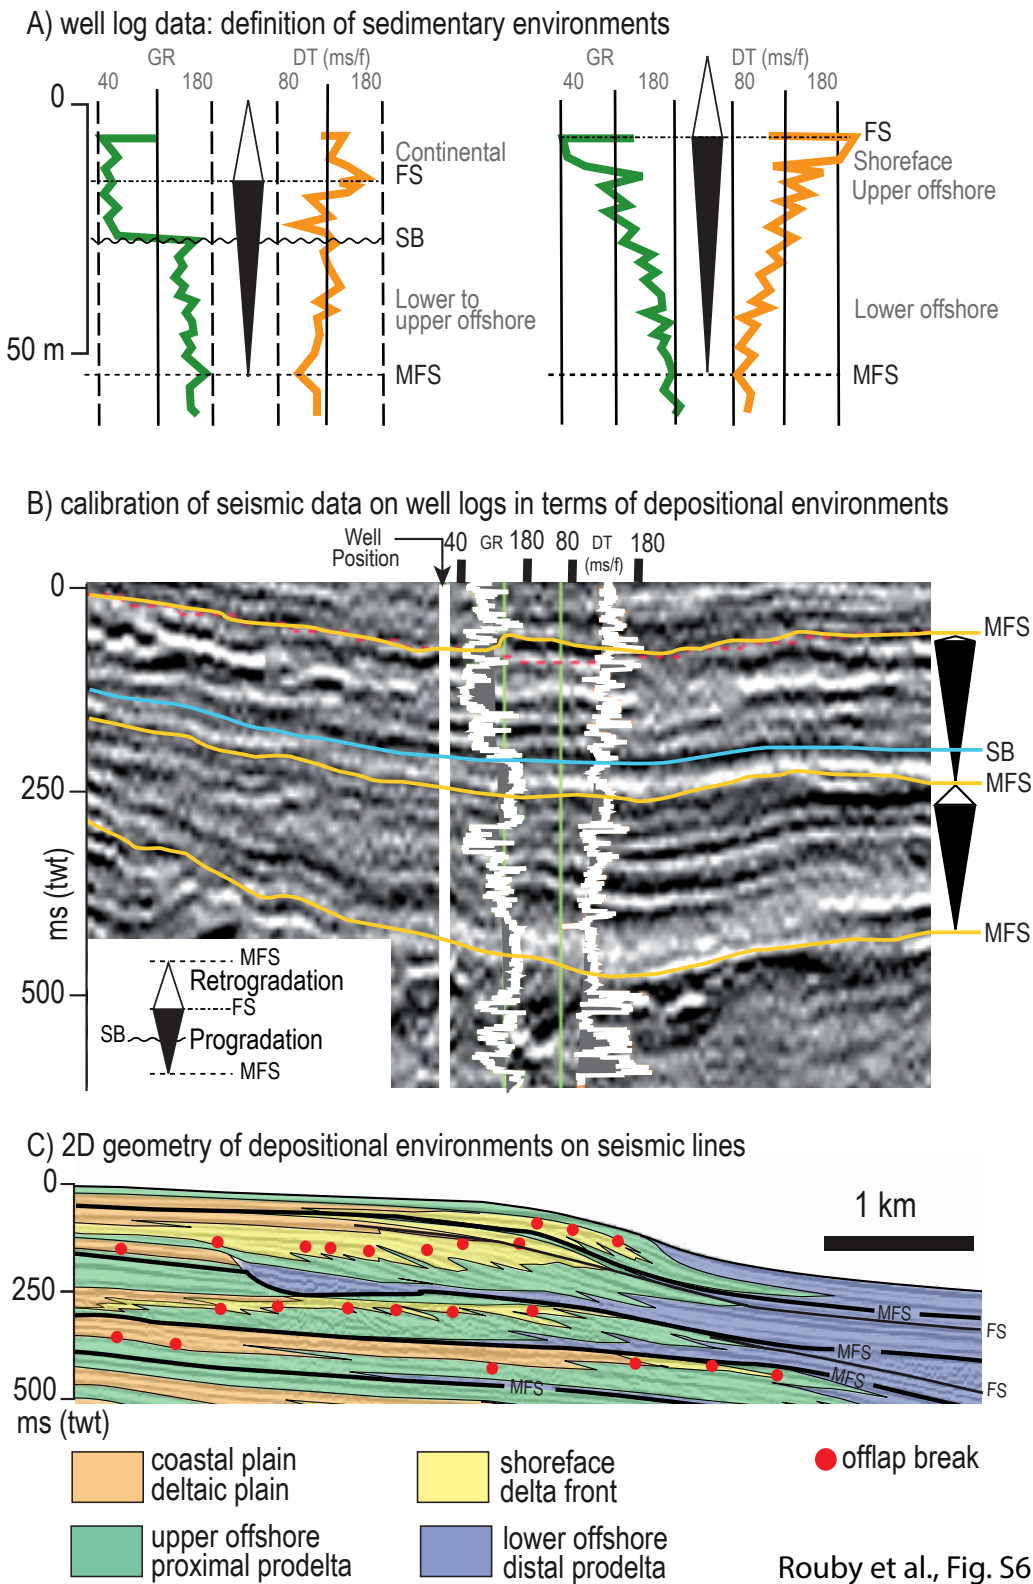

Rouby et al., Fig. S6

Supplement: Supplementary file 1 [file 1]

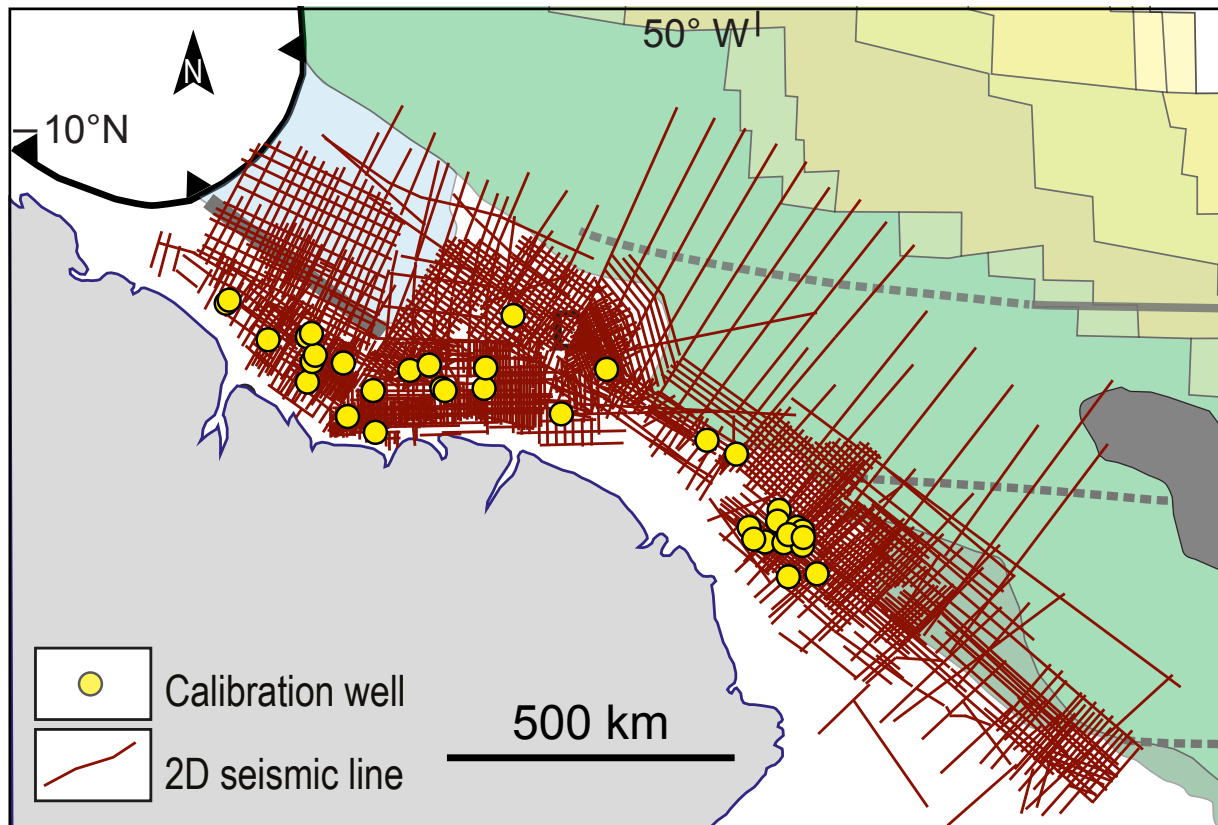

Rouby et al., Fig. S1

Supplement: Supplementary file 2 [file 1]

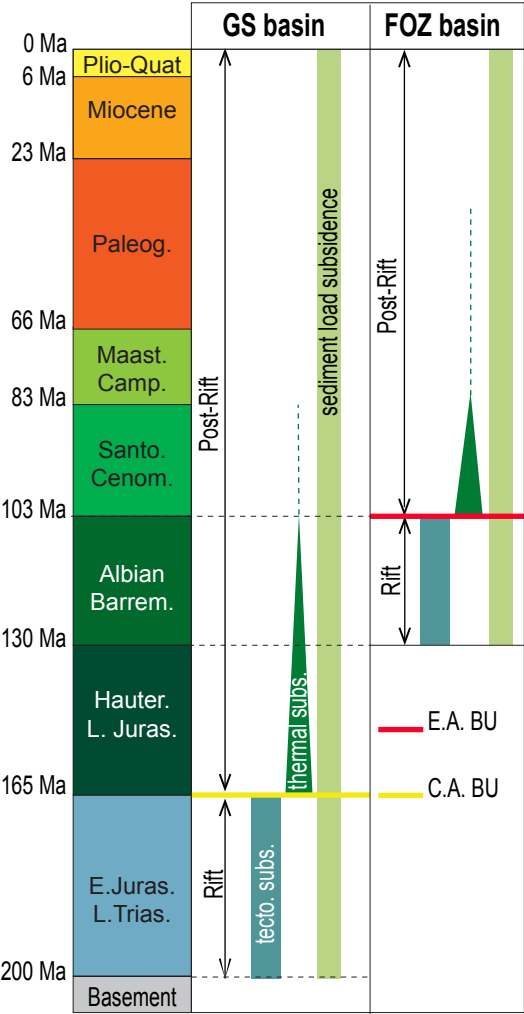

Rouby et al, Fig. S2

Supplement: Supplementary file 3 [file 1]

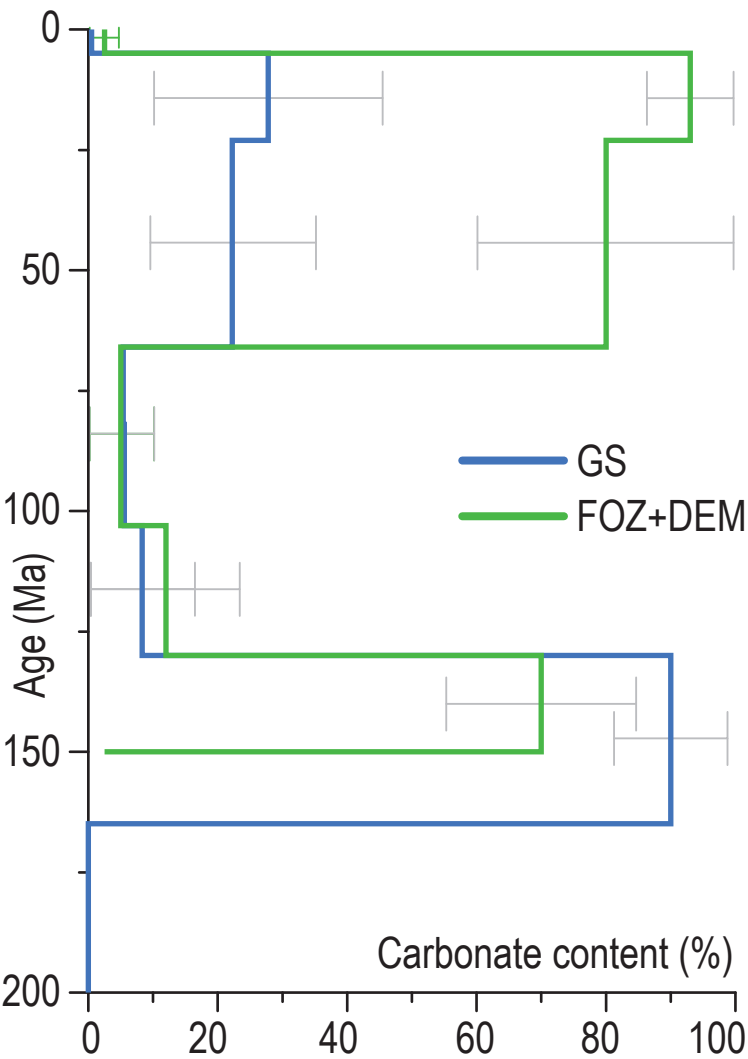

Rouby et al., Fig. S7

Supplement: Supplementary file 6 [file 1]
